# Supplementary material for: A star-shaped bipolar host material based on carbazole and dimesitylboron moieties for fabrication of highly efficient red, green and blue electrophosphorescent devices
Source: Royal Society of Chemistry journal article supplement (doi:10.1039/c3tc32236j), 2013-12-09
Supplement: c3tc32236j.pdf [file c3tc32236j.pdf]

## Electronic Supplementary Information

### A star-shape bipolar host material based on carbazole and dimesitylboron moieties for fabrication of highly efficient red, green and blue electrophosphorescent devices

Heping Shi,<sup>\*a</sup> Dehua Xin,<sup>a</sup> Xiuqing Dong,<sup>a</sup> Jian-xin Dai,<sup>a</sup> Xiaohuan Wu,<sup>a</sup> Yanqin Miao,<sup>b</sup> Li Fang,<sup>a</sup> Hua Wang<sup>\*b</sup> and Martin M. F. Choi<sup>\*c</sup>

<sup>a</sup>School of Chemistry and Chemical Engineering, Shanxi University, 92 Wucheng Road, Taiyuan 030006, Shanxi Province, China. E-mail: hepingshi@sxu.edu.cn; Fax: +86-351-7011688; Tel.: +86-351-7010588

<sup>b</sup>Key Laboratory of Interface Science and Engineering in Advanced Materials, Taiyuan University of Technology, Taiyuan 030024, Shanxi Province, China. E-mail: wanghua001@tyut.edu.cn

<sup>c</sup>Department of Chemistry, Hong Kong Baptist University, 224 Waterloo Road, Kowloon Tong, Hong Kong SAR, China. E-mail: mfchoi@hkbu.edu.hk; Fax: +852-34117348; Tel.: +852-34117839

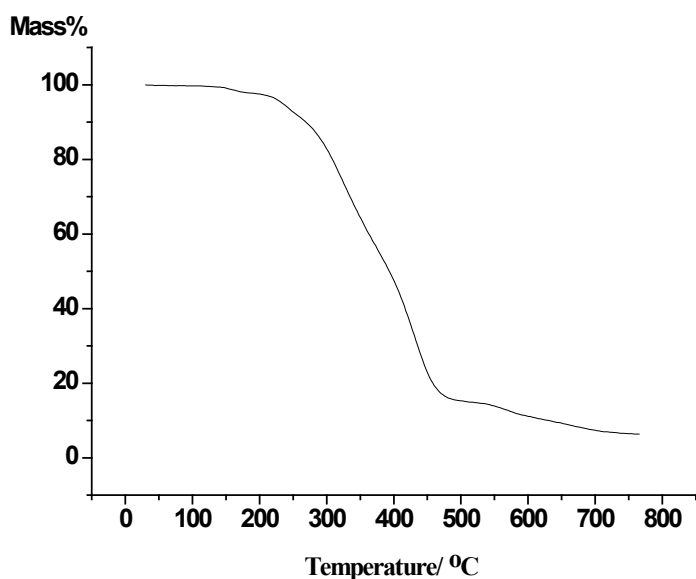

Fig. S1. TGA curve of BDDPC.

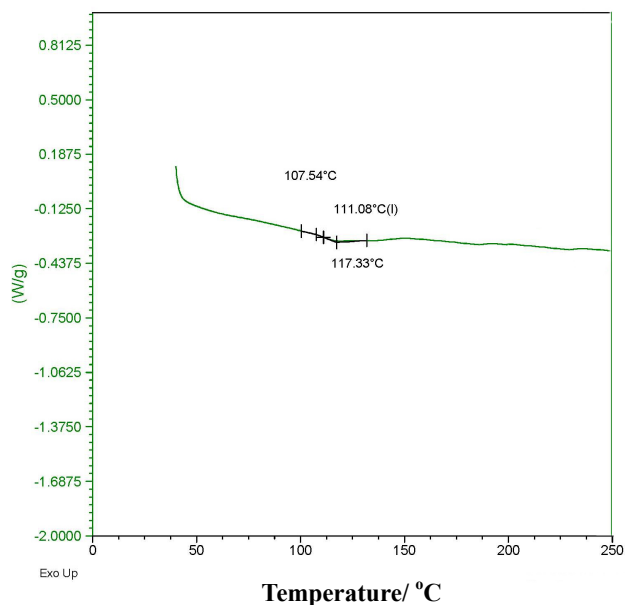

Fig. S2. DSC curve of BDDPC.

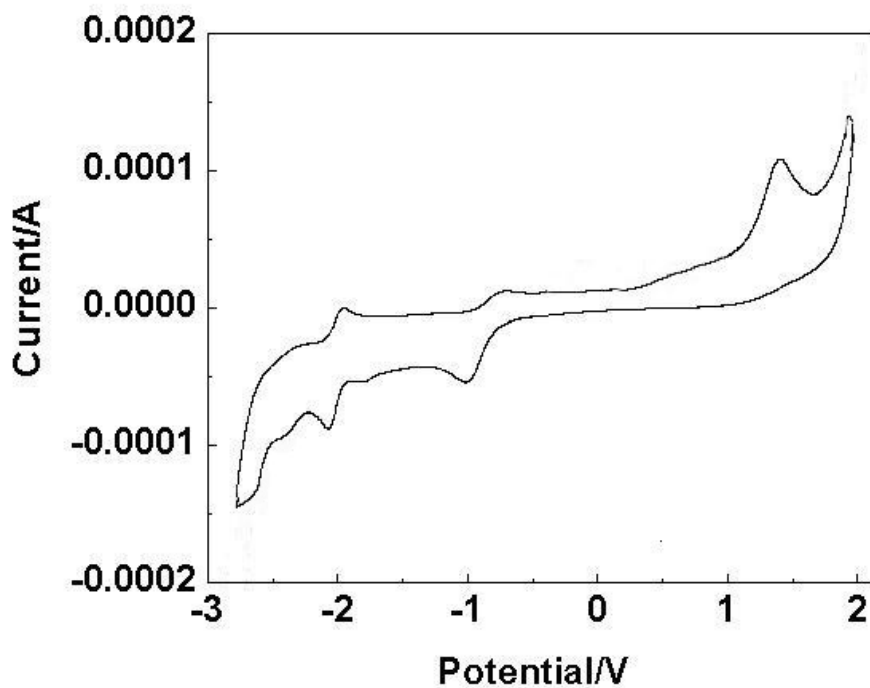

Fig. S3. Cyclic voltammogram of **BDDPC**.

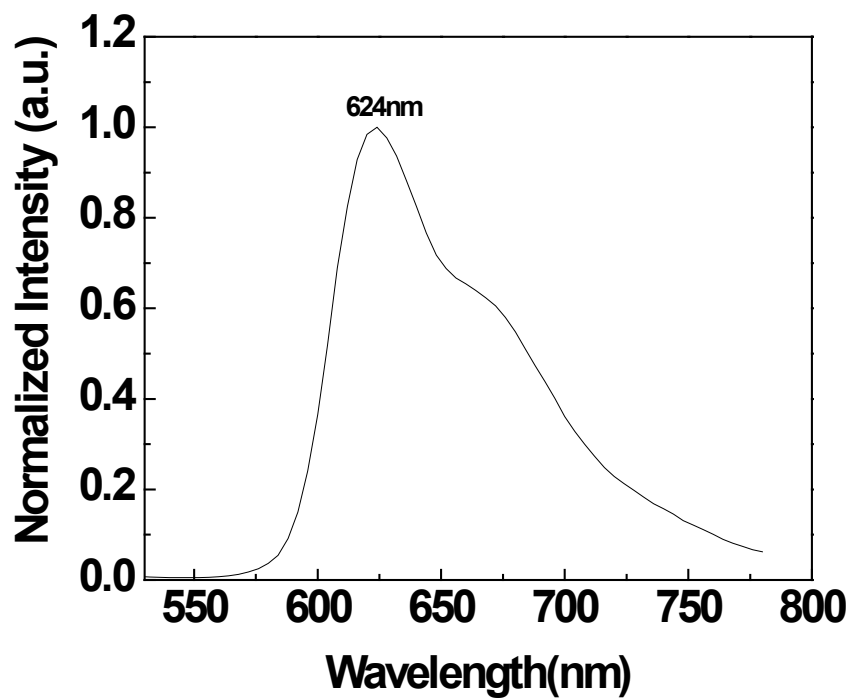

Fig. S4. Normalized electroluminescence spectra of **Device R** measured at different applied voltages. All spectra show the same spectral feature.

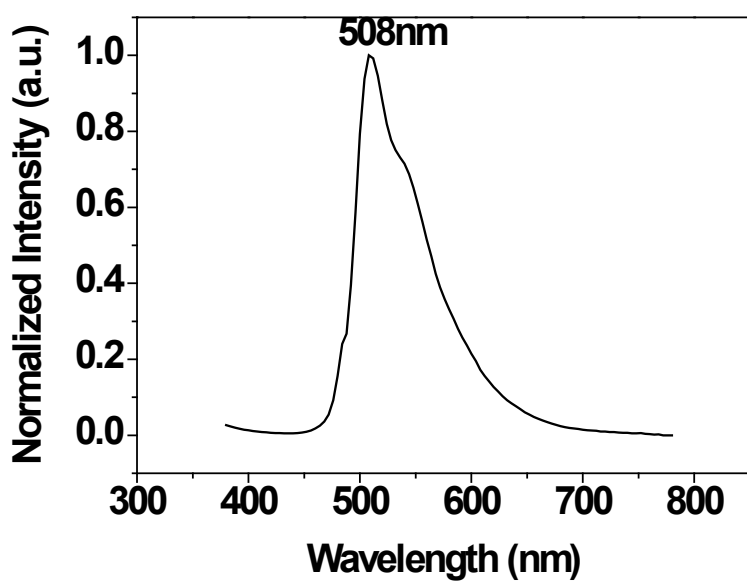

**Fig. S5.** Normalized electroluminescence spectrum of **Device G** taken at different voltages. All spectra display similar spectral characteristics.

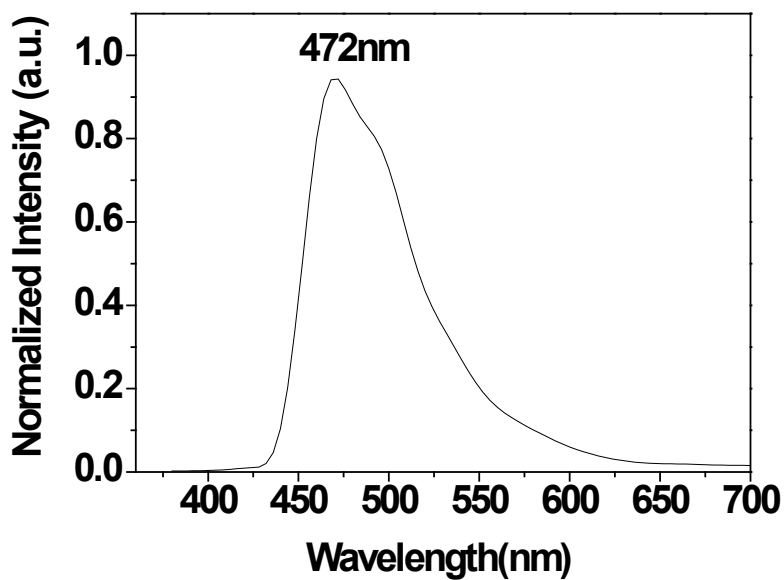

**Fig. S6.** Normalized electroluminescence spectrum of **Device B** taken at different voltages. All spectra display similar spectral characteristics.
